# Supplementary material
Source: MDPI journal article supplement (https://www.mdpi.com/2673-4591/56/1/116)

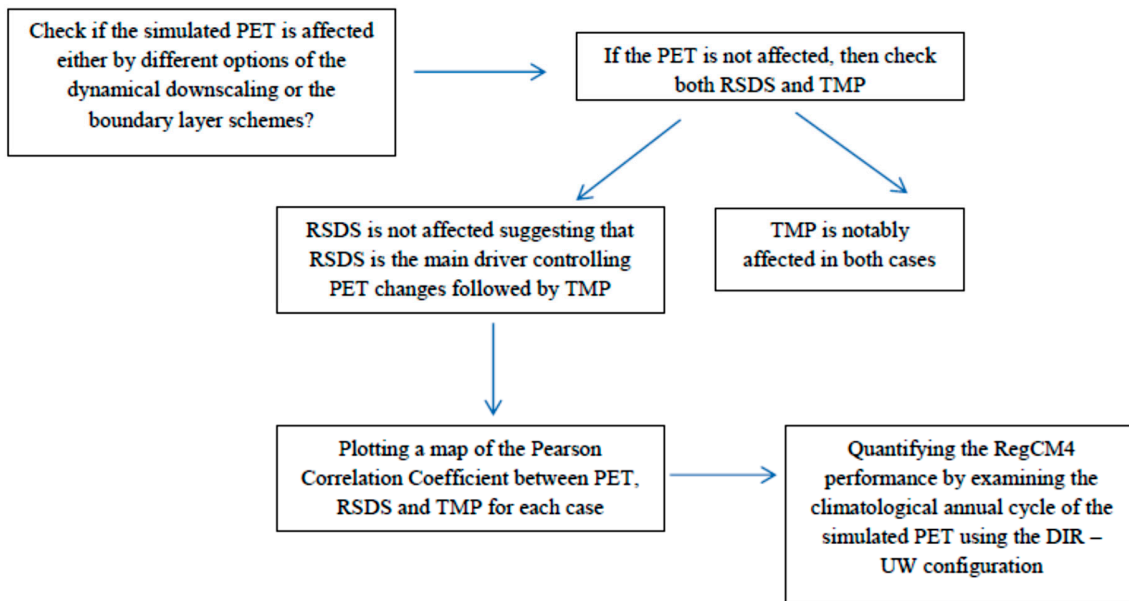

**Figure S1. A methodological flowchart summaries the steps of the present study**

Supplement: s1 [file s1]
